# Supplementary material
Source: Springer Nature journal article supplement (https://www.springermedizin.de/resource/supplementary/12884_2012_637_MOESM1_ESM.pdf/9458344)
Supplement: MOESM1 [file 9458344]

Level 1

Parity

Level 2

**SOCIO-ECONOMIC VARIABLES**

Socio-economic status  
Father's schooling  
Mother's schooling  
Mother's marital status

Level 3

**MATERNAL BIOLOGIC VARIABLES**

Age  
Height  
Mother's own birthweight (low birthweight)  
Mother's own gestational age (prematurity)  
Skin color

**PATERNAL BIOLOGIC VARIABLE**

Age

Level 4

**MATERNAL BEHAVIOR IN INDEX PREGNANCY (pregnancy that ended in 2004)**

Smoking  
Coffee consumption

**MATERNAL REPRODUCTIVE PAST HISTORY**

Interpartal interval  
Abortion history  
Newborn's sex  
Preterm history

Level 5

**PRENATAL CARE**

Number of prenatal visits  
Gestational age at the first prenatal visit

Level 6

**MORBIDITIES IN INDEX PREGNANCY (pregnancy that ended in 2004)**

Arterial hypertension  
Anaemia  
Miscarriage threat  
Urinary tract infection  
Last trimester bleeding  
Premature labor  
Weight gain

**LOW BIRTHWEIGHT RECURRENCE**
